# Supplementary material for: Genesis Mechanism and Resource Evaluation of Low-Temperature Hydrothermal Geothermal Fields in Wenquan County, Xinjiang
Source: Research Square preprint supplement (doi:10.21203/rs.3.rs-7251739/v1), 2025-09-16
Supplement: Supplementary file 1 [file bd97128432aa669fe27de69d.docx]

Summary of Hydrochemical Properties of Geothermal Fluids

| Test item  /  Sample number | K+  mg/l | Na+  mg/l | Ca2+  mg/l | Mg2+  mg/l | Cl-  mg/l | F-  mg/l | SO42-  mg/l | HCO3-  mg/l | H2SiO3  mg/l | H3BO3  mg/l | Total dissolved solids  mg/l | Total hardness  mg/l | PH | Chemical type | Remarks |
| --- | --- | --- | --- | --- | --- | --- | --- | --- | --- | --- | --- | --- | --- | --- | --- |
| ZK2 | 3.9 | 183.6 | 12.0 | 0.0 | 67.4 | 14.7 | 247.8 | 24.4 | 90.7 | 17.41 | 656.8 | 30.0 | 8.75 | SO4-Na | Geothermal water |
| AKT3 | 5.8 | 254.5 | 32.1 | 2.4 | 92.2 | 13.1 | 393.8 | 12.2 | 79.4 | 16.27 | 904.3 | 90.1 | 8.33 | SO4-Na | Geothermal water |
| Q4 | 10.15 | 516 | 196.0 | 4.63 | 145 | 6.77 | 1058.56 | 42.90 | 72.20 | 10.2 | 2336 | 523.22 | 7.88 | SO4·Cl-Na·Ca | Geothermal water |
| ZK3 | 3.86 | 172.1 | 26.35 | 2.1 | 148.71 | 14.26 | 205.86 | 56.10 | 92.9 | 11.69 | 619 | 36.86 | 8.6 | SO4-Na | Geothermal water |
| ZK1 | 3.29 | 171.9 | 13.7 | 1.2 | 146.15 | 14.79 | 166.98 | 46.20 | 77.7 | 11.59 | 532 | 33.04 | 8.2 | SO4-Na | Geothermal water |
| KC2 | 4.1 | 175.35 | 12.45 | 1.3 | 60.92 | 14.82 | 217.74 | 19.8 | 87.2 | 12.14 | 654 | 37.89 | 9.36 | SO4-Na | Geothermal water |
| AKT1 | 2.9 | 170.2 | 12.0 | 0.7 | 63.1 | 13.9 | 223.8 | 21.4 | 49.2 |  | 573.0 | 33 | 9.23 | SO4-Na | Geothermal water |
| AKT2 | 4.6 | 201.5 | 6.0 | 1.2 | 62.0 | 15.1 | 259.4 | 36.6 | 76.6 |  | 664.1 | 20.0 | 9.05 | SO4-Na | Geothermal water |
| AKT3 | 5.5 | 182.8 | 8.0 | 0.2 | 68.4 | 14.1 | 257.4 | 14.6 | 78.0 | 19.8 | 644.4 | 21.0 | 8.7 | SO4-Na | Geothermal water |

Statistical Summary of Soil Element Parameters at 0m Depth, Wenquan County

|  | Hg | As | Sb | Bi |
| --- | --- | --- | --- | --- |
| Number of samples before elimination | 261.00 | 261.00 | 261.00 | 261.00 |
| Number of samples after elimination | 257.00 | 248.00 | 252.00 | 245.00 |
| Mean value before elimination | 15.21 | 13.44 | 0.85 | 0.33 |
| Mean value after elimination | 14.15 | 12.67 | 0.81 | 0.31 |
| Standard deviation | 10.82 | 5.37 | 0.33 | 0.14 |
| Maximum value | 130.00 | 33.40 | 2.40 | 0.91 |
| Minimum value | 3.00 | 2.70 | 0.13 | 0.12 |
| Lower limit of anomaly | 35.79 | 23.42 | 1.48 | 0.59 |

Statistical Summary of Soil Element Parameters at 1m Depth, Wenquan County

|  | Hg | As | Sb | Bi |
| --- | --- | --- | --- | --- |
| Number of samples before elimination | 262.00 | 262.00 | 262.00 | 262.00 |
| Number of samples after elimination | 256.00 | 247.00 | 256.00 | 245.00 |
| Mean value before elimination | 12.25 | 12.64 | 0.81 | 0.33 |
| Mean value after elimination | 11.29 | 11.58 | 0.76 | 0.29 |
| Standard deviation | 8.37 | 6.56 | 0.49 | 0.16 |
| Maximum value | 100.00 | 47.60 | 5.60 | 1.10 |
| Minimum value | 3.00 | 1.30 | 0.12 | 0.07 |
| Lower limit of anomaly | 28.04 | 24.70 | 1.75 | 0.62 |

Statistical Summary of Soil Element Parameters at 2m Depth, Wenquan County

|  | Hg | As | Sb | Bi |
| --- | --- | --- | --- | --- |
| Number of samples before elimination | 228.00 | 228.00 | 228.00 | 228.00 |
| Number of samples after elimination | 225.00 | 224.00 | 220.00 | 218.00 |
| Mean value before elimination | 11.85 | 12.79 | 0.77 | 0.32 |
| Mean value after elimination | 10.99 | 11.52 | 0.71 | 0.30 |
| Standard deviation | 9.66 | 11.68 | 0.50 | 0.17 |
| Maximum value | 130.00 | 112.00 | 4.50 | 1.60 |
| Minimum value | 3.00 | 1.40 | 0.14 | 0.11 |
| Lower limit of anomaly | 30.32 | 34.88 | 1.71 | 0.63 |

Note: In the table, the unit for Hg is 10⁻³ μg/g, while the units for As, Sb, and Bi are μg/g.

Rock Radioactive Element Detection Statistical Table 1

| No. | Analysis ID | Sample ID | Test Items (Units) | | |
| --- | --- | --- | --- | --- | --- |
| U | Th | K |
| (μg/g) | (μg/g) | (%) |
| 1 | 2019Y5000 | KC2-30050 | 33.7 | 21.3 | 2.68 |
| 2 | 2019Y5001 | KC2-20260 | 54 | 10.4 | 1.75 |
| 3 | 2019Y5002 | KC2-50430 | 74.5 | 11.3 | 0.72 |
| 4 | 2019Y5003 | KC2-40100 | 97.2 | 5.71 | 2.28 |
| 5 | 2019Y5004 | KC2-11360 | 5.68 | 9.99 | 2.07 |
| 6 | 2019Y5005 | KC2-81445 | 7.01 | 8.27 | 3.2 |
| 7 | 2019Y5006 | KC2-77350 | 6.15 | 7.27 | 1.68 |
| 8 | 2019Y5007 | KC2-60160 | 4.21 | 10.9 | 0.296 |
| 9 | 2019Y5008 | KC2-70100 | 6.46 | 9.84 | 1.35 |

Rock Radioactive Element Detection Statistical Table 1

| No. | Analysis ID | Sample ID | Test Items (Units) | | |
| --- | --- | --- | --- | --- | --- |
| U | Th | K |
| (μg/g) | (μg/g) | (%) |
| 1 | 2020Y3927 | KC1-11850 | 5.06 | 11 | 1.82 |
| 2 | 2020Y3928 | KC1-52870 | 3.31 | 3.86 | 0.974 |
| 3 | 2020Y3929 | KC1-82165 | 4.54 | 6.25 | 1.12 |
| 4 | 2020Y3930 | KC1-92890 | 4.4 | 8.95 | 2.3 |
| 5 | 2020Y3931 | KC1-42910 | 2.95 | 7.45 | 1.42 |
| 6 | 2020Y3932 | KC1-61530 | 2.63 | 6.65 | 1.33 |
| 7 | 2020Y3933 | KC1-120075 | 1.75 | 0.66 | 0.138 |
| 8 | 2020Y3934 | KC1-31155 | 4.27 | 4.13 | 1 |
| 9 | 2020Y3935 | KC1-72995 | 3.77 | 10.2 | 2.08 |
| 10 | 2020Y3936 | KC1-100815 | 4.75 | 5.68 | 1.02 |
| 11 | 2020Y3937 | KC1-22155 | 5.39 | 7.35 | 2.07 |
| 12 | 2020Y3938 | KC1-110920 | 3.18 | 7.07 | 1.59 |

Ground Temperature Measurement Table

| NO. | Temperature | NO. | Temperature | NO. | Temperature | NO. | Temperature | NO. | Temperature |
| --- | --- | --- | --- | --- | --- | --- | --- | --- | --- |
| 1 | 12.50 | 12 | 15.77 | 23 | 17.06 | 34 | 19.04 | 45 | 20.84 |
| 2 | 13.89 | 13 | 15.87 | 24 | 17.35 | 35 | 19.65 | 46 | 21.04 |
| 3 | 14.08 | 14 | 16.16 | 25 | 17.46 | 36 | 19.65 | 47 | 21.23 |
| 4 | 14.47 | 15 | 16.16 | 26 | 17.46 | 37 | 19.84 | 48 | 21.53 |
| 5 | 14.58 | 16 | 16.56 | 27 | 17.85 | 38 | 20.15 | 49 | 22.34 |
| 6 | 14.77 | 17 | 16.56 | 28 | 17.85 | 39 | 20.15 | 50 | 22.74 |
| 7 | 14.87 | 18 | 16.56 | 29 | 18.07 | 40 | 20.44 | 51 | 23.13 |
| 8 | 14.87 | 19 | 16.67 | 30 | 18.36 | 41 | 20.44 | 52 | 23.53 |
| 9 | 15.08 | 20 | 16.77 | 31 | 18.36 | 42 | 20.53 | 53 | 24.11 |
| 10 | 15.09 | 21 | 16.77 | 32 | 18.65 | 43 | 20.54 | 54 | 30.08 |
| 11 | 15.27 | 22 | 16.88 | 33 | 18.75 | 44 | 20.55 | 55 | 48.38 |
